# Supplementary material for: X-ray induced ultrafast charge transfer in thiophene-based conjugated polymers controlled by core-hole clock spectroscopy
Source: Royal Society of Chemistry journal article supplement (doi:10.1039/d3cp04303g), 2023-12-15
Supplement: d3cp04303g1.pdf [file d3cp04303g1.pdf]

Cite this: DOI: 00.0000/xxxxxxxxxx

## X-ray induced ultrafast charge transfer in thiophene-based conjugated polymers controlled by core-hole clock spectroscopy<sup>†</sup>. Electronic Supplementary Information.

Nicolas Velasquez,<sup>a</sup> Fernanda B. Nunes,<sup>b</sup> Oksana Travnikova,<sup>a,c</sup> Iyas Ismail,<sup>a,c</sup> Renaud Guillemin,<sup>a,c</sup> Jessica B. Martins,<sup>a,‡</sup> Denis Céolin,<sup>c</sup> Loïc Journal,<sup>a,c</sup> Laure Fillaud,<sup>d</sup> Dimitris Koulentianos,<sup>a,e</sup> Chinnathambi Kamal,<sup>f,g</sup> Ralph Püttner,<sup>h</sup> Maria Novella Piancastelli,<sup>a</sup> Marc Simon,<sup>a,c</sup> Michael Odelius,<sup>i</sup> Marcella Iannuzzi,<sup>\*b</sup> Tatiana Marchenko<sup>\*a,c</sup>

### 1 APPENDIX A: SAMPLES CHARACTERISATION

Depending on the procedure used for a P3HT film preparation, two orientations of the polymer chains on the substrate are possible<sup>1</sup>. In the edge-on orientation, the self-organised lamella sheets are positioned perpendicular to the substrate, while in the face-on orientation, the lamellae are fixed parallel to the substrate.

Following the prescriptions provided in literature<sup>2</sup>, we have chosen the rotational spin-coating frequency of 2000 revolutions per minute and the chloroform solution concentration of 5 mg/ml that lead to formation of a film with face-on orientation. Furthermore, our x-ray diffraction analysis of the film, using a Cu K $\alpha$  source in a symmetric  $\theta/2\theta$  geometry, revealed a signature at 24° corresponding to the inter-chain  $\pi - \pi$  stacking, which indicates a face-on orientation of the film<sup>3,4</sup>. In addition, no sharp structures typical for an edge-on orientation were observed. The ~34 nm thickness of the P3HT film was determined using atomic force microscopy.

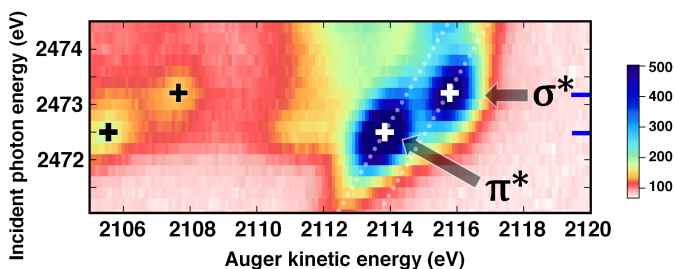

Fig. S1 2D maps of S KL<sub>2,3</sub>L<sub>2,3</sub> Auger spectra recorded in P3HT film at grazing incidence. Transitions to the  $2p^{-2}(1S)\pi^*$  and  $2p^{-2}(1S)\sigma^*$  final states are indicated with black crosses. Transitions to the  $2p^{-2}(1D)\pi^*$  and  $2p^{-2}(1D)\sigma^*$  states, indicated with white crosses, are labelled as  $\pi^*$  and  $\sigma^*$ . Blue lines indicate the corresponding resonant photon energies. Diagonal dotted lines show dispersive behaviour of resonant structures. The map is normalised to the background. The colour-coded intensities are on a logarithmic scale.

The measurements presented in Fig. 3 of the main text were performed at normal incidence with the polarisation of the incident x-ray beam parallel to the sample surface. Assuming a face-on orientation of the P3HT film, in this geometry one can expect a dominant excitation of the S  $1s^{-1}\sigma^*$  state. Indeed, this can be observed in Fig. 3 of the main text. For comparison, Fig. S1 shows a 2D map of S KL<sub>2,3</sub>L<sub>2,3</sub> Auger spectra for P3HT measured in grazing incidence geometry, where the x-ray beam polarisation is perpendicular to the sample surface, leading to a primary excitation of the S  $1s^{-1}\pi^*$  state. Note, that a dominant excitation of the S  $1s^{-1}\pi^*$  state in the case of grazing incidence geometry and a resulting overlap of the strong resonant  $2p^{-2}\pi^*$  feature with a weak low-energy peak, prevents us from a reliable fitting analysis in the whole photon energy range of the 2D map and therefore, does not allow revealing a possible CT process in this geometry.

A strong angular dependence observed for the P3HT sample, demonstrating dominant excitation of the S  $1s^{-1}\sigma^*$  state for normal incidence, and the S  $1s^{-1}\pi^*$  state for grazing incidence geometry, further corroborates the face-on orientation of the P3HT conjugate plane.

Note that our measurements did not reveal angular depen-

<sup>a</sup> Sorbonne Université, CNRS, Laboratoire de Chimie Physique-Matière et Rayonnement, LCPMR, F-75005 Paris Cedex 05, France. E-mail: tatiana.marchenko@sorbonne-universite.fr

<sup>b</sup> Department of Chemistry, University of Zurich, Zurich 8057, Switzerland. E-mail: marcella.iannuzzi@chem.uzh.ch

<sup>c</sup> Synchrotron Soleil, L'Orme des Merisiers, Saint-Aubin, F-91192 Gif-sur-Yvette, France.

<sup>d</sup> Sorbonne Université, CNRS, Laboratoire Interfaces et Systèmes Electrochimiques, LISE, F-75005 Paris Cedex 05, France.

<sup>e</sup> Department of Physics, University of Gothenburg, Origovägen 6B, SE-412 96 Gothenburg, Sweden.

<sup>f</sup> Theory and Simulations Laboratory, TCPS, Raja Ramanna Centre for Advanced Technology, Indore 452013, India.

<sup>g</sup> Homi Bhabha National Institute Training School Complex Anushakti Nagar, Mumbai, Maharashtra 400094, India.

<sup>h</sup> Fachbereich Physik, Freie Universität Berlin, Arnimallee 14, D-14195 Berlin, Germany

<sup>i</sup> Department of Physics, Stockholm University, AlbaNova University Center, 10691 Stockholm, Sweden

<sup>‡</sup> Present address: X-ray Science Division, Argonne National Laboratory, 9700 S. Cass Ave, Lemont, IL 60439, USA

dence for the PT powder sample, which is consistent with the isotropic morphology of the powdered polymer. Similarly, measurements (not shown here) of a PT film, prepared using a potentiostatic electrochemical deposition technique, lack angular dependence. This points at a poor organisation of the PT film structure, probably related to the imperfect deposition conditions. Therefore, these measurements were excluded from the data analysis.

## 2 APPENDIX B: EHRENFEST MOLECULAR DYNAMICS IN P3HT FILM

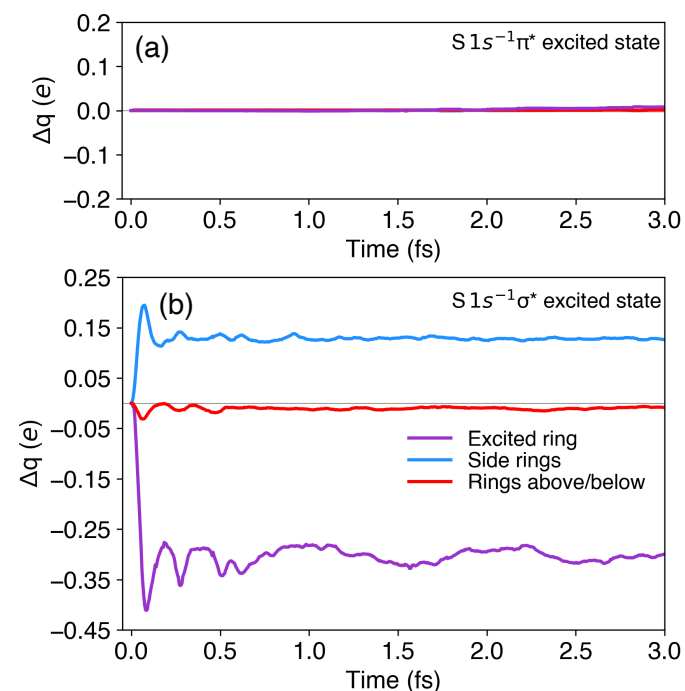

Fig. S2 Bader charge analysis in P3HT using EMD formalism for the first 3 fs of simulation considering only the excited thiophene ring and its nearest neighbours for (a)  $S 1s^{-1}\pi^*$  and (b)  $S 1s^{-1}\sigma^*$  states. The gray line denotes  $\Delta q=0$ . Negative (positive) values indicate electron depletion (accumulation).

RT-TDDFT simulations can be compared to the Ehrenfest molecular dynamics (EMD) formalism<sup>5,6</sup>. In this case, the electronic wavefunction evolution is coupled to the nuclei motion in a mean-field approach, obtained by averaging over all quantum mechanical states. Bader charge analysis performed for P3HT using EMD for the first 3 fs of propagation (see Fig. S2), shows very similar results to RT-TDDFT simulations presented in Fig. 9 of the main text. Therefore, the choice of neglecting the nuclear motion in the RT-TDDFT approach does not seem to affect the CT process taking place within the first fs after these specific core-excitations.

## 3 APPENDIX C: RT-TDDFT SIMULATIONS IN PT FILM

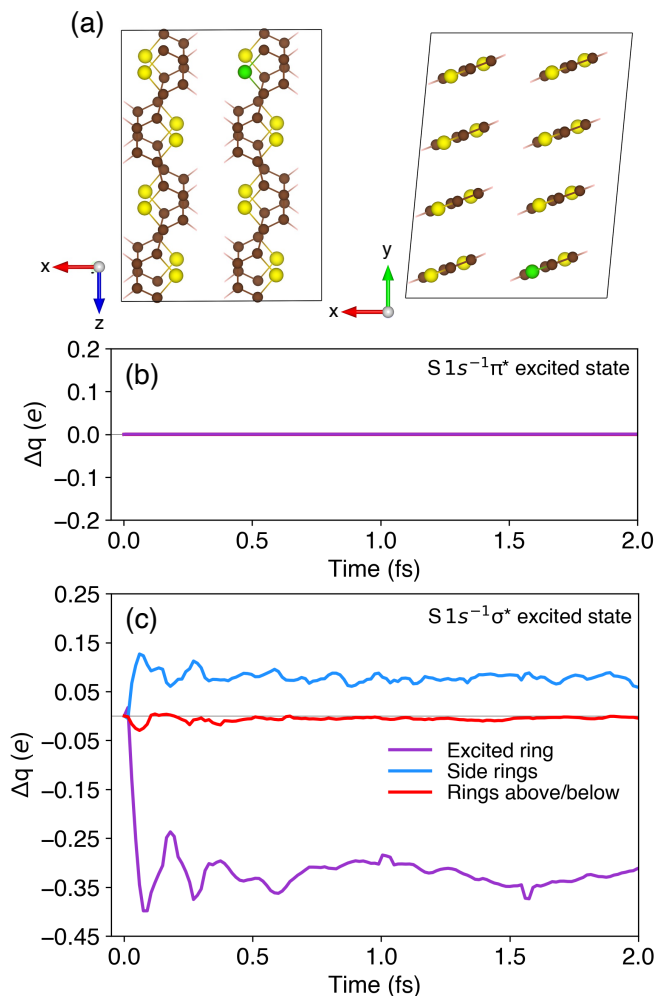

Fig. S3 (a) Ball and stick representation of PT simulation cell employed in the RT-TDDFT simulations. colour code: brown for carbon, yellow for sulfur, green for chlorine (Z+1 approximation), light pink for hydrogen. (b) and (c) Bader charge analysis in  $S 1s^{-1}\pi^*$  and  $S 1s^{-1}\sigma^*$  core-excited states for the first 2 fs of simulation considering the excited thiophene ring and its nearest neighbours. The gray line denotes  $\Delta q=0$ . Negative (positive) values indicate electron depletion (accumulation).

### Notes and references

- 1 H. Sirringhaus, P. J. Brown, R. H. Friend, M. M. Nielsen, K. Bechgaard, B. M. W. Langeveld-Voss, A. J. H. Spiering, R. A. J. Janssen, E. W. Meijer, P. Herwig and D. M. de Leeuw, *Nature*, 1999, **401**, 685–688.
- 2 D. M. DeLongchamp, B. M. Vogel, Y. Jung, M. C. Gurau, C. A. Richter, O. A. Kirillov, J. Obrzut, D. A. Fischer, S. Sambasivan, L. J. Richter and E. K. Lin, *Chem. Mater.*, 2005, **17**, 5610–5612.
- 3 M. E. Nicho, W. Jaimes, M. E. Rivas-Aguilar, H. Hu and M. A. Quevedo-Lopez, *Rev. Mex. Fis.*, 2017, 516–524.
- 4 Y. D. Park, *Bull. Korean Chem. Soc.*, 2014, **35**, 2277–2280.

- 5 S. Andermatt, J. Cha, F. Schiffmann and J. VandeVondele, *J. Chem. Theory Comput.*, 2016, **12**, 3214–3227.
- 6 B. F. E. Curchod, U. Rothlisberger and I. Tavernelli, *ChemPhysChem*, 2013, **14**, 1314–1340.
