# Supplementary figures and images for: X-ray induced ultrafast charge transfer in thiophene-based conjugated polymers controlled by core-hole clock spectroscopy
Source: Royal Society of Chemistry journal article supplement (doi:10.1039/d3cp04303g), 2023-12-15

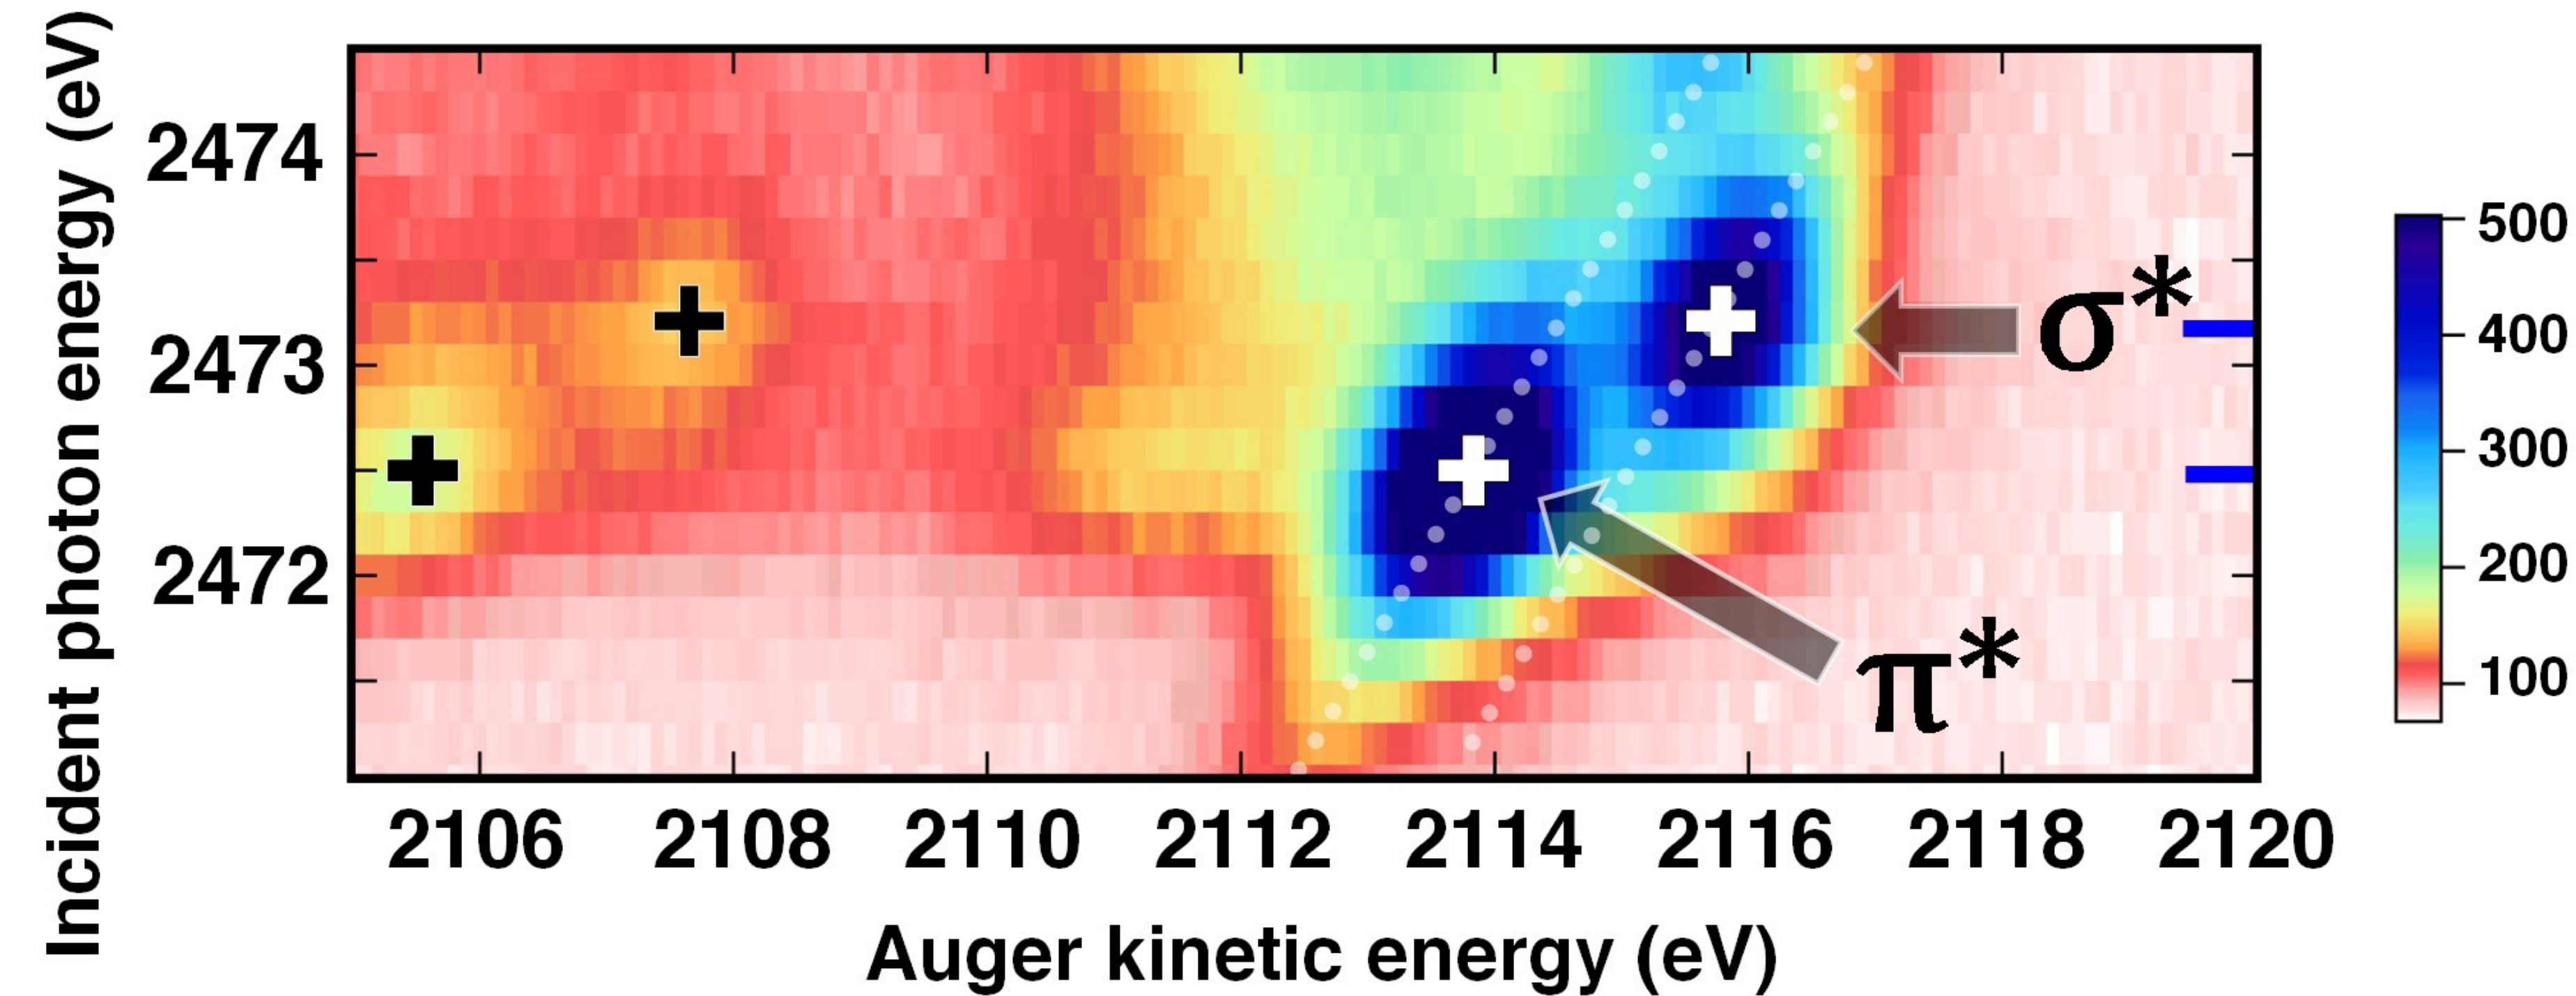

Supplement: d3cp04303g3.pdf [file d3cp04303g3.pdf]

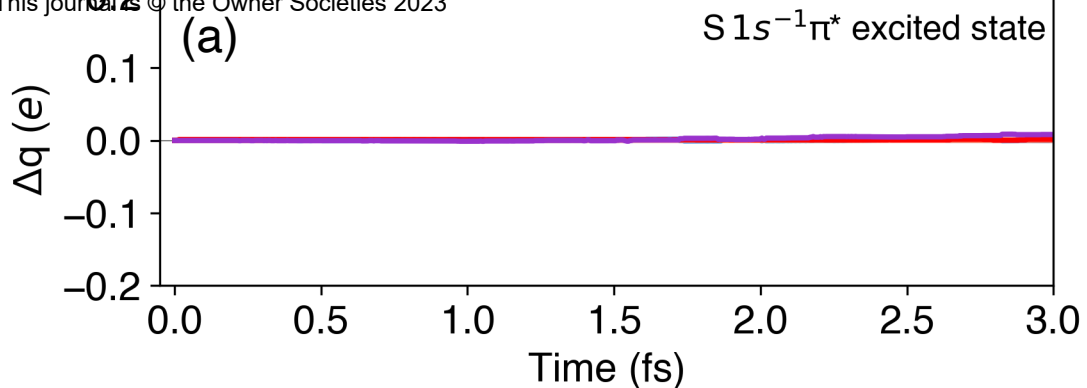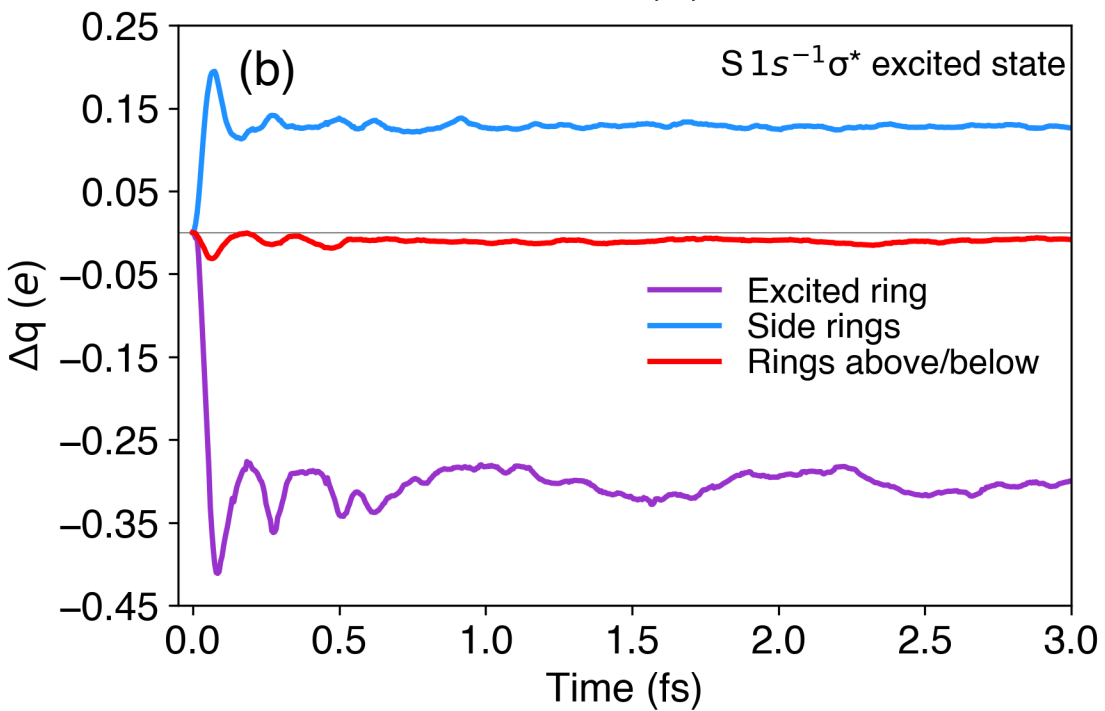

Supplement: d3cp04303g4.pdf [file d3cp04303g4.pdf]

(a)

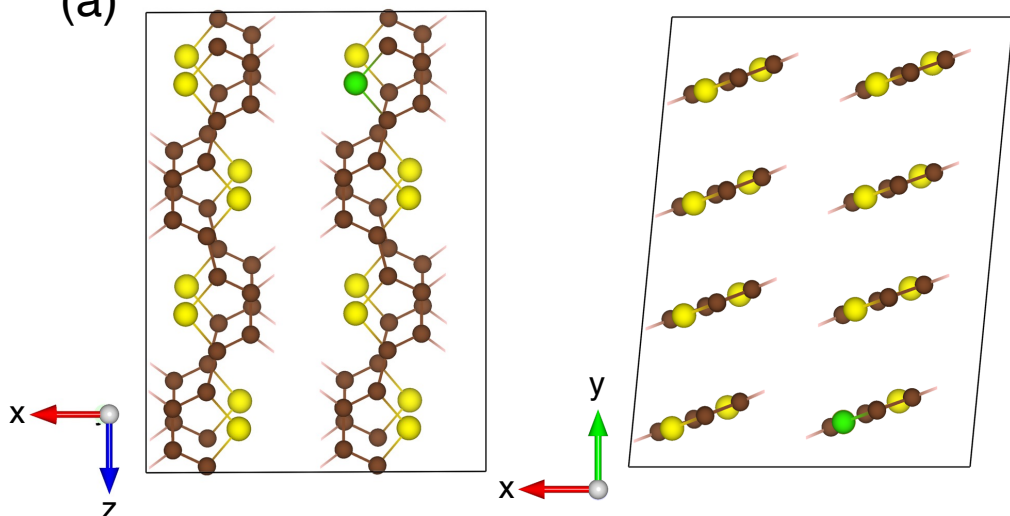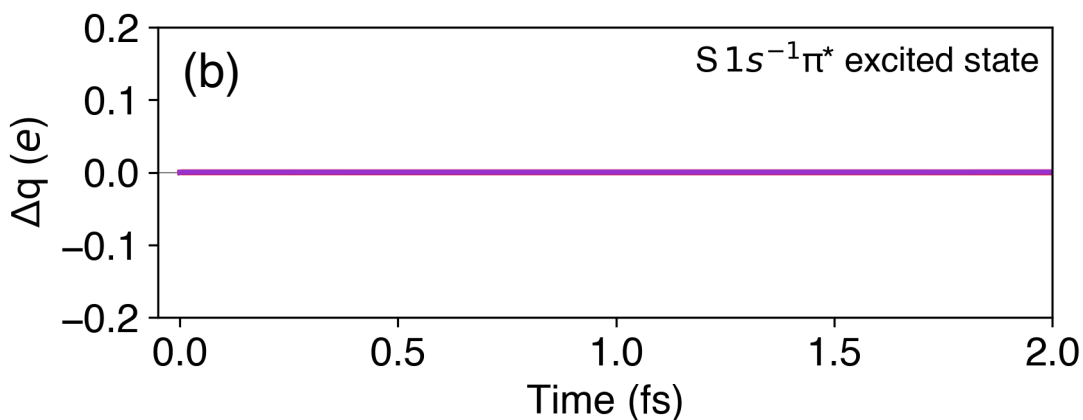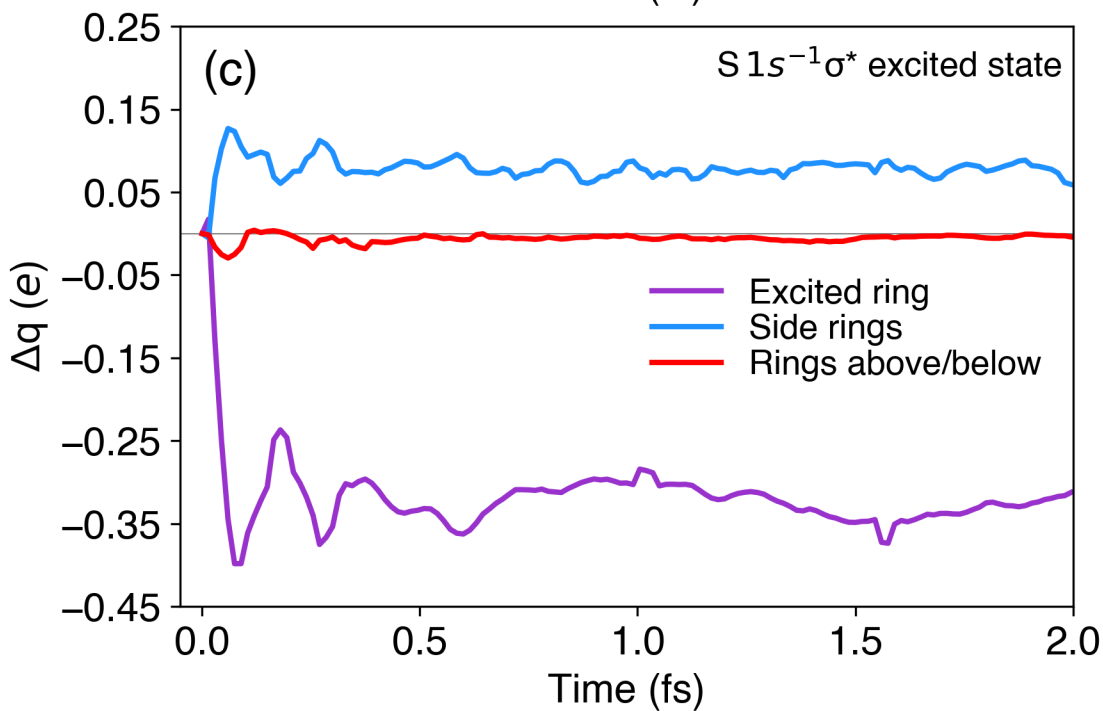

Supplement: d3cp04303g5.pdf [file d3cp04303g5.pdf]
